# Supplementary material
Source: PubMed Central journal article supplement (PMC3464497)
Supplement: NIHMS386125-supplement-01.pdf [file NIHMS386125-supplement-01.pdf]

# **Supplemental Material**

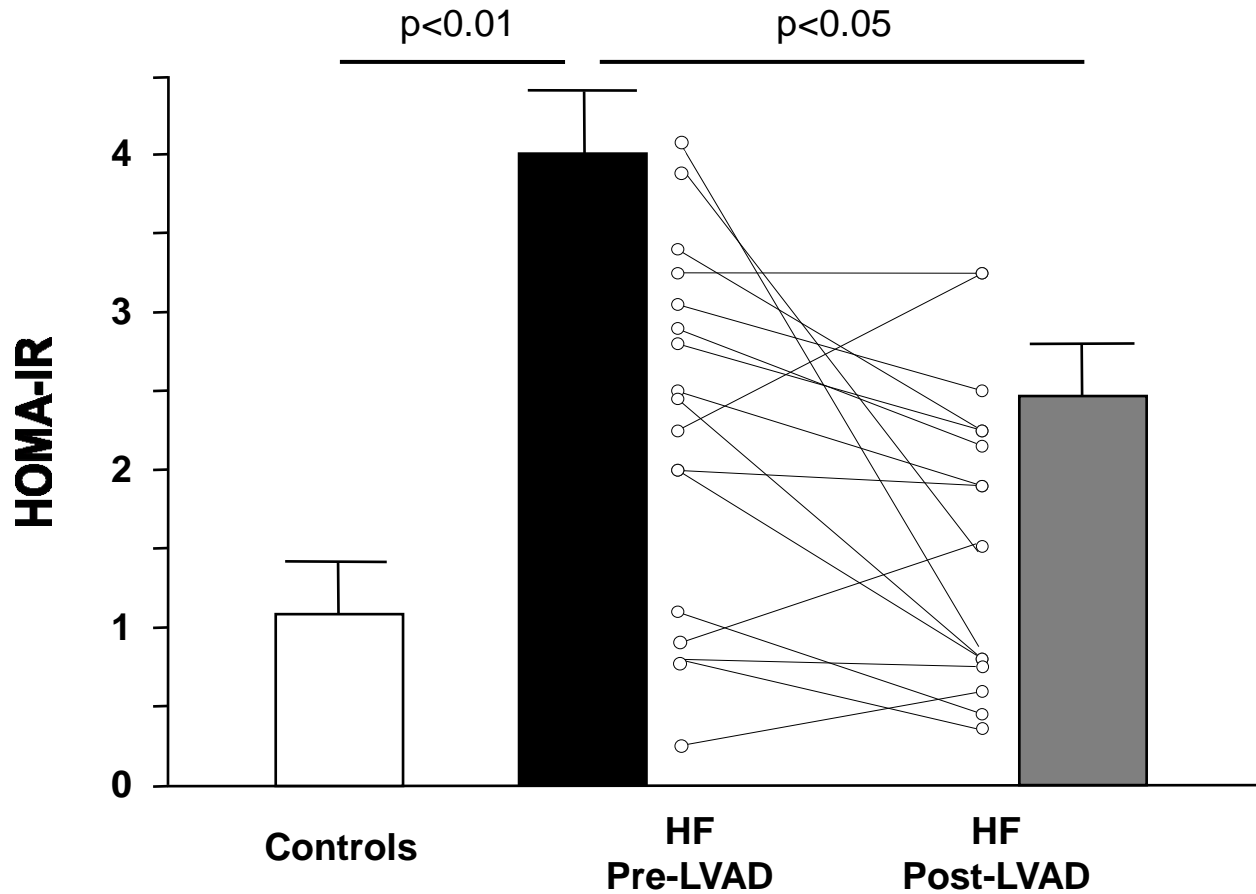

### Supplemental Figure 1

Individual changes of HOMA-IR in patients undergoing LVAD placement.
